# Supplementary material for: Effects of an Ultra-brief Computer-based Mindfulness Training on Mindfulness and Self-control: a Randomised Controlled Trial Using a 40-Day Ecological Momentary Assessment
Source: Springer Nature journal article supplement (doi:10.1007/s12671-019-01204-9), 2019-07-31
Supplement: MOESM1 [file 17029046]

**Abstract**

**Objectives:** This study examined whether an ultra-brief mindfulness (UBM) training can change state mindfulness and perceived state self-control in daily life (primary outcomes), ultimately improving habitual mindfulness and perceived self-control (secondary outcomes). To gain a better understanding of the beneficial effects of practicing mindfulness, the study additionally examined how mindfulness and self-control were related to each other during the training.

**Methods:** The randomised controlled trial combined a 40-day ecological momentary assessment with seven weekly surveys. Undergraduate students (*Nenrolled* = 137, 104 females, *Mage*= 23.08, *SD* = 5.04 years), were either assigned to the UBM training (*n* = 68) or wait-list control condition (*n* = 69). Primary outcomes were assessed six times a day using ecological momentary assessments (seven-point scales). Secondary outcomes were measured weekly (six-point scales). A breath counting task at pre- and post-training was an additional behavioural measure of mindfulness.

**Results:** An intention-to-treat multivariate mixed model identified day-to-day training effects (group x days-interaction) on state mindfulness (*b* = .005, *p* = .001) and perceived state self-control (*b* = .007, *p* < .001). A mediation analysis revealed that state mindfulness mediated the training effect on perceived state self-control (*b* = .001, *p* < .001). Habitual mindfulness (*b* = .049, *p* < .001) and breath counting task performance (*b* = 2.446, *p* = .043) also improved with training whereas habitual perceived self-control did not.

**Conclusions:** These findings suggest that state mindfulness and perceived state self-control may be interconnected in daily life and may be similarly improved through an UBM training.

Effects of an ultra-brief computer-based mindfulness training on mindfulness and self-control:

a randomised controlled trial using a 40-day ecological momentary assessment

Mindfulness is often characterised by two main facets (Bishop et al. 2004) that can be described as present moment awareness, an ongoing attention monitoring towards momentary sensations, and a non-judgmental and accepting stance towards all kinds of sensations (Lindsay & Creswell 2017). Both facets may help people to focus on present sensations while simultaneously observing and accepting them as passing events (Bishop et al. 2004; Kabat-Zinn 1990). Mindfulness has been associated with mental and physical health (Brown, Ryan, & Creswell 2007) and numerous programs teach mindfulness with the goal of improving participants’ health (e.g., Kabat-Zinn 1990; Linehan 1993; Segal, Williams, & Teasdale 2002). For example, a recent meta-analysis (Khoury et al. 2013) found large and clinically relevant effects of mindfulness-based programmes on stress, anxiety, and depression, and moderate effects on other physical and medical conditions when comparing pre- to post-training states. Thus, practicing mindfulness may be particularly beneficial for people who go through an important developmental period, such as college students, (Hunt & Eisenberg 2010) as they are at heightened risk for unsafe health behaviours and mental disorders (Auerbach et al. 2016). However, mindfulness trainings typically involve several sessions and practice modules to give participants ample time to fully grasp the underlying rationale and core principles of mindfulness (Kabat-Zinn 1982). For instance, the mindfulness-based stress reduction program (MBSR; Kabat-Zinn 1990) consists of eight weekly 2.5 hour classes, along with one all-day class and instructions to meditate daily for the duration of the program. These time demands may be barriers for busy people, potentially discouraging them from participating in a mindfulness training (Carmody & Baer 2009).

To facilitate participation in mindfulness trainings for people with a heightened risk for unsafe health behaviours and mental disorders, such as college students, several low-intensity trainings have recently been developed and evaluated. For example, mindfulness trainings that involved four to six weekly classes, each lasting 45–120 minutes, have been found to improve dispositional mindfulness (e.g., Canby, Cameron, Calhoun, & Buchanan 2015; Josefsson, Lindwall, & Broberg 2014). Current evidence suggests that even ultra-brief mindfulness (UBM) trainings that had a strong focus on enhancing present moment awareness, such as four 20-minute breathing meditation sessions or even a single mindfulness session lasting 5–15 minutes could increase mindfulness (Mahmood, Hopthrow, & de Moura 2016; Zeidan, Johnson, Diamond, David, & Goolkasian 2010), improve pain tolerance (Liu, Wang, Chang, Chen, & Si 2013), and could be helpful to enact self-control behaviour (Friese, Messner, & Schaffner 2012) immediately after mindfulness meditation in laboratory settings. Ruscio, Muench, Brede, MacIntyre, and Waters (2016) also provided evidence that a brief mindfulness training that consisted of four different types of meditations, focusing on enhancing present moment awareness, could help participants to apply mindfulness to their everyday lives. These authors used an ambulatory assessment approach (Trull & Ebner-Priemer 2013) to examine mindfulness in the flow of daily life and to record the exact time spent engaging in home practice, thereby reducing recall bias and increasing ecological validity. This approach also allows researchers to study the effects of mindfulness trainings beyond self-reported mindfulness in laboratory settings.

Since UBM trainings had beneficial short-term effects on health-related outcomes, it is interesting to understand how exactly the present moment awareness facet of mindfulness may change daily life experiences and behaviours, which then improve health in the long run. Feltman, Robinson, and Ode (2009) have suggested that mindfulness is an important and even necessary requirement to control and change one’s own automatic behaviours that may cause poor health. As such, mindfulness seems to be strongly linked to self-control (Feltman et al. 2009), the self’s ability to regulate one’s cognitions, emotions, impulses, and behaviours to be consistent with one’s values and long-term goals (Baumeister, Heatherton, & Tice 1994). On the one hand, the ability to control oneself can be conceptualized as individuals’ actual acts of self-control (e.g., Hofmann, Baumeister, Förster, & Vohs 2012; Muraven 2010), such that self-controlled individuals are assumed to successfully resist conflicting desires (Baumeister et al. 1994). In this kind of view, acting self-controlled is supposed to be effortful and exhaustive (Baumeister, Bratlavsky, Muraven & Tice 1998). On the other hand, self-control can also be seen as an ability self-concept that does not consider the actual enactment of self-control (Grund & Carstens 2019). Grund and Carstens (2019) showed that established self-report measures such as the Self-Control Scale (Tangney, Baumeister & Boone 2004) rather tap into one’s self-concept of self-control than into enacted self-control. Even though recent research has found that one’s self-concept of self-control and acts of self-control are not necessarily linked with each other, such that high self-perceived self-control did not predict more enactments of self-control (Grund & Carsten 2019; Hofmann et al., 2012), a plethora of studies has found that an individual’s perceived self-control, as assessed via self-report measures, is indeed positively associated with several health relevant outcomes, academic success, and prosocial behaviours (e.g., de Ridder, Lensvelt-Mulders, Finkenauer, Stok, & Baumeister 2012; Tangney et al 2004).

Recent studies’ findings have also indicated that individuals who ascribed themselves as being self-controlled actually avoided situations that were not in line with their goals in the first place (Hofmann et al. 2012) and that they perceived behaviours as rather effortless when they were consistent with their personal self-set goals (Grund & Carstens 2019). Consequently, the conscious monitoring of one’s own personal goals plays an important role when ascribing oneself as being self-controlled. Whenever an individual perceives the self-control ability as low, this may be interpreted as mental fatigue during which attention can no longer be focused on self-set long term goals and instead is shifting towards immediately more rewarding short-term goals so that individuals feel more motivated to act on impulse (Inzlicht & Schmeichel 2012). In line with this, the momentary perception of having a high self-control ability can be interpreted as a state in which attention and motivation are easily oriented towards one’s personal goals.

Consequently, practicing the ability to stay in the present moment may help people to enhance their perceived self-control by improving focused attention monitoring (Kaplan 2001; Lindsay & Creswell 2017). In line with this notion, individuals who train mindfulness may find it easier to consciously monitor their goals, which may then facilitate individuals’ choices to select behaviours in accordance to them (Deci & Ryan 1980). For example, Brown and Ryan (2003) found mindful individuals to act more on their personal goals. Individuals may then perceive those goal-directed behaviours as being effortless and easy to fulfil (Rheinberg & Engeser 2010). In line with this notion, Grund and Carstens (2019) found that individuals reported less effortful behaviours when these were self-determined and driven from the individuals’ motivation. Finally, this may result in individuals to believe that they are increasingly able to act in line with their goals, which may be reflected by enhanced self-ascribed perceived self-control.

The present study aimed at investigating the effects of an UBM training on the present moment component of mindfulness and perceived state self-control in everyday life. Thus, this study examined whether UBM training effects on the present moment component of mindfulness and perceived state self-control were associated with each other, using multivariate mixed models that consider associations between outcomes and that allow for testing differential training effects.

**Methods**

**Participants**

To examine small effects (Cohens’s *d* = 0.33; Khoury et al. 2013) in changes of the primary outcomes state mindfulness and perceived state self-control with a power of 1-β = .95 at an alpha level of α = .05 for two-sided tests using mixed models, we aimed to recruit 134 participants with an expected 10% drop-out rate. This would require a total sample of *N* = 120 who complete the study without an early termination. In the end, we oversampled the study by recruiting 137 participants of which 126 participants completed the study. The power analysis was based on a power calculation formula for multilevel models (Aarts, Verhage, Veenvliet, Dolan, & van der Sluis 2014).

We recruited undergraduate psychology students at the Institute of Psychology through flyers and social media, and via announcements during lectures. All psychology students were offered course credit for their participation. Additionally, they had the chance to win one of two 100 EUR vouchers for a shopping website, if they demonstrated a signal compliance of at least 80%.

Eligibility criteria were the ability to understand and speak German, and to operate a smartphone. Participants needed to be between 18 and 65 years old and to provide informed consent. Participants were not eligible to participate if they reported carrying any mental or physical diagnosis or impairment that might have affected study participation.

**Randomisation.** At the beginning of the study, participants were assigned to the training or control condition using a random allocation rule (Schulz & Grimes 2002), which was defined beforehand. Research assistants who gave instructions to the participants and started the computer-sessions did not prepare the coding list and could not change the preliminary allocation to a condition. Blinding of either the research assistants or the participants was not possible due to the controlled-waiting list design. In this way, participants were sequentially assigned to either the UBM training (*n* = 68) or the control condition (*n* = 69).

**Procedure**

This registered (ClinicalTrials.gov: NCT02647801), two-armed six-week randomised controlled, non-blinded trial and was designed to evaluate the effects of an UBM training versus a wait-list control condition in an undergraduate college student population (Rowland, Wenzel, & Kubiak 2016; <https://osf.io/bzr6e/>). We implemented seven weekly laboratory sessions (t0–t6), combined with a 40-day ambulatory ecological momentary assessment. This trial was approved by the local ethics committee at the Institute of Psychology (2015-JGU-psychEK-011) and met all ethical standards laid down in the Declaration of Helsinki (2013).

Participants of both the experimental and control conditions took part in all seven weekly laboratory sessions. Habitual self-control and mindfulness measurements were taken during the baseline session (t0; before any UBM training had started) and end-of-training sessions (t6; all measures are described in later sections). Between these pre- and post-assessments, participants in both conditions attended five consecutive weekly sessions (t1–t5) during which they also self-reported habitual mindfulness and self-control. However, only participants allocated to the mindfulness condition completed a computer-based breathing meditation during these sessions (Levinson, Stoll, Kindy, Merry, & Davidson 2014). Laboratory sessions took place in an office at the Institute of Psychology. Up to three participants from either the mindfulness or control condition were tested simultaneously in a single test session. A research assistant was always present to give instructions and answer any questions.

The 40-day ecological momentary assessment started the day after the baseline session (Days 1–40). Each day, participants in both conditions received six prompts on their smartphone (participants who did not have their own smartphone were loaned a device). Prompts were randomly distributed between 10 am and 8 pm using the application movisensXS, Version 0.8.4203 (movisens GmbH, Karlsruhe, Germany). When prompted, participants were asked to complete short questionnaires measuring their current experiences. On average, the 137 participants answered 170.08 (SD = 52.60) out of 240 possible signals (70.9%) with a minimum of 3 and a maximum of 234 answered signals.

**UBM training**. Participants allocated to the mindfulness condition practiced mindfulness during five weekly laboratory sessions (t1–t5), completing a 12-minute computer-based breathing meditation (Levinson et al. 2014). As much as possible, sessions were to be scheduled at the same time and weekday of each week. If participants were not able to come to an appointment, it was possible to re-schedule the session to a different time and weekday.

In the first training session, a research assistant introduced the concept of mindfulness and the breathing meditation. Participants then sat in front of a computer screen and listened to a guided breathing meditation via headsets. During this meditation participants were instructed to focus on their breathing sensations and to guide their attention to their breath by repeatedly counting their breath from one to nine, pressing a specific key from breath one to eight (downward arrow) and for breath nine (right arrow). Whenever they realized that their attention shifted away from their breath, they were instructed to gently guide their attention back to their breath and the present moment sensations, accepting other emotions and cognitions as they occurred. As an additional help, they heard a sound when they miscounted their breath and pressed the wrong key so that they could focus on their breath again (Levinson et al. 2014). Following each breathing meditation, the research assistant and the participants talked about the participants’ experiences during the breathing meditation, and participants reported their habitual mindfulness and self-control. This procedure was repeated at all laboratory sessions.

On a voluntary basis, those assigned to the mindfulness condition were asked to train themselves in mindfulness at home. Using movisensXS, participants were encouraged to listen to a breathing meditation (11 minutes) or to do a body scan (23 minutes) on a daily basis. The body scan was explained by the research assistant. Additionally, the research assistant handed out a manual that described aims (e.g., openness and curiosity instead of relaxation) and possible difficulties (e.g., inner restlessness) that may occur when practicing mindfulness. Starting from t1 and at each following session, the research assistant asked about participants’ experiences during their practice and encouraged the participants to continue the practice of mindfulness on a daily basis, if possible.

To apply mindfulness further in their everyday life, participants were asked to practice mindfulness with an informal mindfulness task (starting from t2) in accordance with the MBSR programs (Kabat-Zinn 1990), consciously paying attention to a self-selected every-day activity in the course of the week (e.g., brushing teeth or taking a shower). At each following session, the research assistant asked about the participants’ experiences during their selected activities and encouraged them again to continue the conscious acting of a specific activity that may otherwise be acted on ‘autopilot’.

**Control condition.** Participants allocated to the wait-list control condition also attended all weekly laboratory sessions and completed the same set of self-report questionnaires. After they finished filling out the questionnaires, they confirmed the next week’s appointment and the session was finished. Sessions for participants from the control condition were separated from those in the mindfulness condition, so control participants did not overhear any instructions on mindfulness.After study completion, participants in the wait-list control condition were able to receive the audio files that were used in the UBM training (body scan and guided breathing meditation) to train mindfulness at home.

**Measures**

**Primary outcome measures.** Primary outcomes were assessed via smartphone, six times a day for 40 consecutive days. State Mindful Attention Awareness Scale (S-MAAS; Brown & Ryan 2003; German version by Michalak, Heidenreich, Ströhle, & Nachtigall 2008): The S-MAAS assesses state mindfulness (i.e., degree of present moment awareness since the last assessment) and originally consisted of five items. We shortened this to three items (Items 8, 10, and 14, which showed the highest loadings based on a previous study), reducing participant time burden and maintaining strong between-person and within-person reliability.Within- and between-person reliabilities were calculated for each week (Shrout & Lane 2012). These reliabilities were then averaged over all six weeks with a very good between-person reliability *RKRN* = .97 and an acceptable to good within-person reliability *RCN*= .78. The original German items by Michalak et al. (2008) were reworded from present tense to past tense so that we could ask participants on a scale from 0 (*not at all*), 3 (*somewhat*), to 6 (*very much*) to what degree they have rushed through activities without being really attentive to them, to what degree they have done jobs or tasks automatically, without being aware of what they were doing, and to what degree they have found themselves doing things without paying attention since the last signal. The three items were recoded, with higher scores representing higher state mindfulness.

State Self-Control Capacity Scale(SSCCS; Ciarocco, Twenge, Muraven, & Tice, 2007; German version by Bertrams, Unger, & Dickhäuser 2011): The SSCCS consists of 25 items assessing one’s perceived current ability to control oneself. Again, we shortened this to three items (Items 12, 16, and 18; Bertrams et al. 2011) that showed the highest loadings in our previous investigations reducing participant time burden and maintaining strong between-person and an acceptable within-person reliability (*RKRN* = .97; *RCN* = .73). These three items assessed on a scale ranging from 1 (*not at all*) to 7 (*very much*) by asking to what degree participants currently felt like their willpower was gone, to what degree they wanted to give up and to what degree they did not feel able to process further information. Again, all items were recoded so that higher scores indicated more perceived state self-control.

**Secondary outcome measures.** Secondary outcomes were assessed at all seven weekly laboratory sessions. Mindful Attention Awareness Scale(MAAS; Brown & Ryan 2003; Michalak et al. 2008):The MAAS consists of 15 items and measuresindividual differences in how frequently individuals experience present moment awareness on a scale ranging from 1 (*almost always*) to 6 (*almost never*). The MAAS showed good reliability in the present study (*αt0* = .83).

Self-Control Scale (SCS; Tangney et al. 2004; German version SCS-K-D by Bertrams & Dickhäuser 2009): This 13-item SCS measures habitual self-control on a scale ranging from 1 (*not at all like me*) to 5 (*very much like me*). The SCS demonstrated acceptable reliability in the present study (*αt0* = .79).

**Mindfulness performance measure**. Breath Counting Task:As a behavioural measure of mindfulness, we assessed performance of the breath counting task (BCT) at the baseline and end-of-training sessions. In this task, participants count their breaths from one to nine (then beginning again at one) for 18 minutes (Levinson et al. 2014). As in the UBM training, participants had to press a specific key from breath one to eight (down ward arrow) and for breath nine (right arrow). If participants followed this instruction, each pressed key was counted as being correct. An incorrect count was assessed, for example, if participants kept pressing the down ward arrow (instead of the right arrow) at breath nine or if they pressed the right arrow before they finished pressing the down arrow for eight times. Furthermore, they were able to press the space bar every time they noticed that their attention was drifting away from the task. Breath counting accuracy (BCA) was assessed by calculating the percentage of correct counts in relation to all counts (a detailed description of the BCT can be found in Levinson et al. 2014).

We also interrupted the BCT 12 times (approximately every 90 seconds) to assess momentary meta-awareness (i.e., how aware someone was about where one’s attention had been) on a scale ranging from 1 (*completely unaware*) to 6 (*completely aware*) and mind wandering (i.e., where someone’s attention had been) on a scale from 1 (*completely off task*) to 6 (*completely on task*). Responses to these sampling probes were each averaged over the total task at baseline and end-of-training to indicate state meta-awareness and mind wandering, respectively (Levinson et al. 2014).

**Training engagement.** Every time participants listened to either the breathing meditation or the body scan audio file via movisensXS, the time spent practicing at home was tracked with the app. We added the time spent at each home training sessions and created a variable that represented the total time spent practicing at home in hours. Only home practice sessions that lasted longer than 5 minutes were counted as home practice time. The time spent for the informal task was not assessed.

**Baseline characteristics.** Participant age, gender, degree of educational attainment, religiousness, prior experiences in yoga practice and meditation, and substance use were assessed during the baseline session. Big Five Inventory (BFI; John, Donahue & Kentle 1991; German 42-item version by Lang, Lüdtke, & Asendorpf 2001): The BFI uses 42 items to measure the five personality traits of openness (*αt0* = .83), conscientiousness (*αt0* = .86), extraversion (*αt0* = .88), agreeableness (*αt0* = .66), and neuroticism (*αt0* = .82) on a scale from 1 (*disagree strongly*) to 5 (*agree strongly*).

Social Desirability Scale-17 (SDS-17, German version; Stöber 2001): The revised version of the SDS-17 consists of 16 items and measures the tendency to report socially desirable behaviour (*αt0* = .73) in a forced-choice format between (1 = *yes*; 0 = *no*).

**Data Analyses**

All analyses were conducted using the statistics software STATA 15 (College Station, TX, USA: StataCorp LP). Data and syntax can be downloaded from Open Science Framework repository (https://osf.io/3gsh6/). To detect differences between conditions in baseline characteristics and differences between non-completers (i.e., those who ceased participation before t6) and completers (i.e., those who attended all laboratory sessions t0–t6), we used *t*-tests and Wilcoxon rank-sum tests for continuous and chi-square tests for categorical data.

The main analyses were conducted on an intention-to-treat basis, including all 137 participants who were enrolled in the study. Since we expected mindfulness and self-control measures to be associated with each other and since we had multiple observations of both primary (max. 240 times) and secondary outcomes (max. seven times), which were nested within individuals, we used multivariate mixed models (Baldwin, Imel, Braithwaite, & Atkins 2014) to examine our primary research question. As multivariate mixed models accommodate missing observations in data and account for baseline differences in outcome measures, it makes them a good choice for intention-to-treat analyses in longitudinal trials with missing observations (Chakraborty & Gu 2009). Main and interaction effects were included step-by-step (step 1 = main effects; step 2 = adding the interaction effect).

First, we used a three-level multivariate mixed model (Level 1 = observations, Level 2= days, Level 3 = individuals) to similarly model the primary outcomes S-MAAS and SSCCS as a function of a main effect of group (0 = control; 1 = UBM training), a main time effect (Days 1–40) and random intercepts for S-MAAS and SSCCS at an individual and day level, which were allowed to co-vary in all possible ways by adding an unstructured covariance structure. Additionally, we included unique residual variances for S-MASS and SSCCS, and the covariance between them. Those covariances were added to consider relationships between the two outcomes (Baldwin et al., 2014). In a second step, we included an interaction between group and time for S-MAAS and SSCCS. A significant two-way interaction would indicate that the time effect on S-MAAS and SSCCS varied across groups.

Then, we used a two-level multivariate mixed model (Level 1 = sessions, Level 2 = individuals) to examine training effects on the secondary outcomes (MAAS and SCS). These were modelled in a similar way as we modelled the primary outcomes with the only differences being that we used the number of the laboratory session as the time variable (Sessions 0–6) and that we included random intercepts for MAAS and SCS only on an individual level.

After we computed the multivariate mixed models, we used post-hoc tests to further examine the interaction effects on the primary and secondary outcomes. First, to examine whether both primary or secondary outcomes were differently influenced by training mindfulness, we tested for differences in training effects (group x time) between the two primary or secondary outcomes by using a post-hoc likelihood ratio test. A significant post-hoc likelihood ratio test would indicate that there was a difference between the interaction effect on both primary or secondary outcomes, indicating different training effects on S-MAAS and SSCCS, and MAAS and SCS. Second, to understand how groups differed in the way they changed across time, we used post-hoc simple slope analysis, observing the rates of change in the outcomes by group. Third, to observe baseline and end-of training levels of the primary and secondary measures we also reported the estimated marginal means that were obtained from the multivariate mixed models.

To analyse differences between conditions in regard to the objective assessment of mindfulness (BCT outcomes), we used three separate two-level mixed models (Level 1 = pre-and post-assessment, Level 2 = individuals) for each BCT outcome (BCA, mind wandering and meta-awareness) with a random intercept for individuals. Again, we examined the main effects of time (0 = pre-assessment; 6 = post-assessment) and group in a first step, and the two-way interaction between time and group in a second step, which was the parameter of interest.

**Additional analyses.** To examine why individuals may differ in their response to the UBM training, we examined whether interpersonal differences could have influenced the way participants responded to the UBM training across time. Since there are no defined cut-offs for MAAS and SCS, and responder analysis only have low power when dichotomizing a continuous measure into ‘responders’ and ‘non-responders’ (Snapinn & Jiang 2007), we decided to use additional mixed models to examine the moderating effect of baseline characteristics and additional home practice time on each primary and secondary outcome measure in the training condition from baseline to the end of training. All continuous predictor variables were centred on the group mean of the UBM training condition. A significant two-way interaction (baseline characteristic/practice time x time) would indicate different respond rates from baseline to end of training for specific between-person differences. When modelling primary outcomes, we used three-level mixed models (Level 1 = observations, Level 2 = days, Level 3 = individuals), including random intercepts for individuals and days. To model effects on our secondary outcomes, we used two-level mixed models (Level 1 = sessions, Level 2 = individuals) with a random intercept for individuals. Since we tested for multiple possible moderators, we adjusted *p*-values using the Šidák-Holm correction (Holm 1979).

Finally, we were interested in whether the UBM training effect (group x time) on SSCCS could have been mediated by S-MAAS. For this purpose, we computed a mediation analyses on SSCCS using three-level mixed models (Level 1 = observations, Level 2 = days, Level 3 = individuals) with random intercepts for individuals and days, and an independent covariance structure. In a first model, the mediator S-MAAS was predicted by time, group, and the respective two-way interaction, modeling the training effect on S-MAAS (a-path). In a second model, SSCCS (current perceived state self-control) was predicted by the main effects of time (Days 1–40), group (0 = control, 1 = UBM training), the two-way interaction between group and time, modelling the direct effect of the training (c’-path), and the within-person centred mediator S-MAAS, which represented present moment awareness since the last prompt (b-path). To estimate standard errors and 95% confidence intervals of the indirect effect (mediation through S-MAAS: a-path x b-path), we used a bootstrapping approach using 500 repetitions.

**Robustness of results.** Since individuals may have reported different rates of outcome changes across time and to test for robustness of our fixed effect estimates, we additionally included a random slope for time and an unstructured covariance structure to all previously described models in a next step, allowing the covariation between random slopes of time and the random intercepts. However, we opted against adding a random slope to models in which time was coded as a dummy variable (0 = pre-assessment, 6 = post-assessment), which was the case for the BCT models, since this would have resulted in non-convergence of the models.

**Data preparation.** To render training effects comparable in the multivariate mixed models (Baldwin et al. 2014), we matched the primary outcome scales by adding +1 to all item values of S-MAAS (7-point scale for both primary outcomes) and we matched secondary outcomes by transforming the SCS scale from a 5-point scale to a 6-point scale (6-point scale for both secondary outcomes). In this way, the estimated effects can be interpreted as indicating how much the primary outcomes changed on a scale from 1 to 7 and the secondary outcomes changed on a scale from 1 to 6 given a one-unit shift in the predictor variable.

**Results**

Baseline characteristics and all fixed and random effects from each step of the models can be viewed in the Supplementary Material, Table S1–Table S7.Figure S1 in the Supplementary Material gives an overview of the number of participants who were screened, randomised, and retained in the study. The recruitment of participants took place October 2015–February 2016 and May–December 2016. In total, 11 participants prematurely terminated study participations, citing the burden of the daily measurements (*n* = 5), a critical life event (*n* = 1), or no specific reason (*n* = 3). Two further participants agreed to withdraw from study participation due to a lack of participation or a misunderstanding of study instructions. All remaining participants came to all weekly scheduled laboratory sessions. On average, individuals in the control condition completed 6.64 (*SD* = 1.34) sessions, and individuals in the UBM training condition completed 6.59 (*SD* = 1.34) sessions. The only difference between completers and non-completers was in the BFI subscale of extraversion, in that non-completers reported being more extraverted, *t*(135) = -2.395, *p* = .018. However, neither condition allocation nor any other personality traits differed between completers and non-completers, *p’s* > .084. Furthermore, we did not find any significant differences between individuals in the control and UBM training conditions at baseline in regard to their baseline characteristics, *p’s* ≥ .058 (Table S1).

**Primary Outcome Results**

During ecological momentary assessment, we collected 23,302 complete sets of S-MAAS (70.87%) and 23,329 complete sets of SSCCS (70.96%) measurements from all 137 participants. We first computed a multivariate three-level model for both primary outcome measures as our main analysis to consider the outcomes’ interconnectedness.

First, we investigated the main effects of time and group on the primary outcomes. We found that both S-MAAS and SSCCS significantly increased during the study period, which was indicated by significant time effects (S-MAAS: *b* = 0.006, *SE* = 0.001, *p* < .001; SSCCS: *b* = 0.009, *SE* = 0.001, *p* < .001). However, the conditions did not differ in regard to either S-MAAS or SSCCS, as evidenced by non-significant group effects (S-MAAS: *b* = -0.275, *SE* = 0.151, *p* = .069; SSCCS: *b* = 0.039, *SE* = 0.123, *p* = .754).

Then, we included the two-way interaction between time and group (Table 1). We found both S-MAAS and SSCCS to be improved depending on which condition individuals were assigned to. This was indicated by significant two-way interaction effects for both S-MAAS and SSCCS, which translate to effect sizes of *η2* = .009 for S-MAAS and *η2* = .015 for SSCCS. Post-hoc simple slope analyses (Table 1) revealed that participants in both conditions significantly improved in S-MAAS and SSCCS, but participants in the UBM training showed stronger effects with improvements by 4.7% in S-MAAS scores and by 7.1 % in SSCCS scores than participants in the control condition who only increased by 1.9% S-MAAS scores and 3.4 % SSCCS scores in total over the whole study period. To additionally investigate whether the interaction effect on S-MAAS differed from the observed effect on SSCCS, we conducted a post-hoc likelihood ratio test. This post-hoc test revealed that the interaction effects on S-MAAS and SSCCS did not differ significantly, *χ2*(1) = 0.70, *p* = .402. Thus, taken all primary outcome results together, we found similarly small training effects on S-MAAS and SSCCS.

To test for the robustness and the interindividual variability of the fixed effect estimates, we included random slopes for the main effect of time, allowing individuals to change differently in S-MASS and SSCCS (Table S2). We found that only the two-way interaction effect between group and time on SSCCS reached significance, *b* = 0.007, *SE* = 0.003, *p* = .033, whereas the interaction effect on S-MAAS reached only marginal significance, *b* = 0.006, *SE* = 0.004, *p* = .096. As can be seen, the standard error of the interaction effect on S-MAAS increased, which resulted in a less certain estimation of this fixed effect. However, the two two-way interactions on S-MAAS and SSCCS did not differ significantly from each other, *χ2*(1) = 0.08, *p* = .774.

Thus, even though participants in the UBM training tended to show stronger increases in S-MAAS and SSCCS than those in the control condition, participants varied considerably in their rate of change. To understand why individuals differed in the way they responded to the UBM training, we tested for several possible moderators that may explain this unexplained between-person variability (sections ‘Training Engagement Effects’ and ‘Moderation Effects of Interpersonal Characteristics’).

**Secondary Outcome Results**

We then computed a multivariate two-level model for both secondary outcome measures (MAAS and SCS). In the first step of the model, we found significant time effects for both MAAS and SCS, showing that MAAS and SCS increased over time across all individuals (MAAS: *b* = 0.031, *SE* = 0.005, *p* < .001; SCS: *b* = 0.018, *SE* = 0.005, *p* < .001). Individuals across conditions did not differ in either MAAS or SCS in general, which was indicated by non-significant group effects (MAAS: *b* = 0.036, *SE* = 0.104, *p* = .728; SCS: *b* = 0.160, *SE* = 0.130, *p* = .217).

When we included the two-way interaction between time and group, we found a significant interaction effect on MAAS, translated to an effect size of *η2* = .039, but not SCS, which refers to an effect size of *η2* = .006 (Table 1). As can be seen in Table 1, post-hoc simple slope analyses revealed that only participants in the UBM training reported significant increases over time in MAAS. While individuals’ MAAS scores increased on average by only 0.7% during the study in the control condition, they increased by 5.5% in the UBM training. Even though the interaction effect on SCS did not reach significance, and was smaller than the interaction effect on MAAS, *χ2*(1) = 11.16, *p* < .001, we additionally found individuals in the UBM training to report significant increases in SCS over time by 2.3% scores, while individuals in the control condition only improved by 1.3% SCS scores. Thus, individuals in the UBM training showed significantly more improvements in MAAS than individuals in the control condition. Furthermore, participants in the UBM training also improved in SCS, but this improvement did not differ significantly from the SCS increases that we observed in individuals of the control condition.

When adding random slopes for the time effects on MAAS and SCS to the model, the interaction effect on MAAS remained significant, *b* = 0.049, *SE* = 0.015, *p* = .001, and was still significantly different from the interaction effect on SCS, *χ2*(1) = 5.70, *p =* .017.

**Breath Counting Task Results**

Regarding the BCT outcomes we found a significant effect of the two-way interaction between group and time on BCA (Table 1), referring to an effect size of *η2* = 0.034. Post-hoc simple slope analysis revealed that only individuals who took part in the UBM training showed significant improvements in the BCA, with an increase by 2.6% from pre-to-post-assessment (Control condition: 0.1%). Furthermore, even though the interaction effect on mind wandering did not reach significance, the effect size was similar in size (*η2* = 0.026) and the post-hoc simple slope analysis showed that individuals in the UBM training reported significantly more attention on the BCT with an increase by 4.2% on a 6-point scale from pre-to post-measurement (Control condition: -0.05%). Overall, these results hint at an improved BCT performance that may have been caused by our UBM training.

**Training Engagement Effects**

Since participants varied considerably in their rate of outcome change, we additionally tested whether differences in the time practiced at home may explain the variance. In total, 45 participants from the mindfulness condition (*n* = 68) reported practicing mindfulness at home for at approximately 4.2 times (*SD* = 4.2; 1–18 times) with at least 5 and at maximum 23 minutes per session, training for a total of 80.4 minutes over the full study period (*SD* = 81.9, 5.6–366.7 minutes).

Since time spent engaging in home practice has been found to affect the degree of improvement in habitual mindfulness (Carmody & Baer 2008), we examined whether this extra practice time might have improved primary and secondary outcomes in the present study. Using additional mixed models for the mindfulness condition only, we found that the improvements in S-MAAS over time were predicted by the amount of home practice time, which was indicated by a significant interaction effect between time and total practice time in hours on S-MAAS (Table 2). As presented in Table 2, this interaction effect was defined by a significant increase by 8.3% S-MAAS scores over the whole study period in participants who practiced more than others (*M* + 1*SD*) while those who practiced less than others (*M* - 1*SD*) did not show significant improvements in S-MAAS over time (1.0% increase). SSCCS, MAAS and SCS were not significantly affected by this two-way interaction. All effects remained stable when taking random time effects into account (Table S5 and Table S6). These results show that practicing meditation at home may be particularly helpful to implement present moment awareness directly in daily life.

**Moderation Effects of Interpersonal Characteristics**

Next, we looked at interpersonal characteristics which may explain the variability in responding to the UBM training. After correcting for multiple comparisons using the Šidák-Holm-method, high levels of habitual self-control and religiosity as well as familiarity with yoga were associated with a higher rate of change in S-MAAS (Table 3). Surprisingly, those who reported smoking cigarettes seemed to benefit more from the UBM training, experiencing enhanced S-MAAS. Regarding state perceived self-control, we found that participants with high scores in openness experienced lower changes in SSCCS than participants with low openness scores. Furthermore, participants who rated themselves as being high in habitual mindfulness tended to improve less in SCS than participants who were less mindful.

However, when controlling for the random effect of time and adding an unstructured covariance structure, none of these moderation effects remained significant after Šidák-Holm-correction of the *p*-values. Thus, our moderators were not able to fully explain why individuals differed in the way they responded to the UBM training.

**Mediation Effects of State Mindfulness**

To understand how our UBM training improved SSCCS, we investigated whether improvements in S-MAAS mediated the training effect on SSCCS. In our mediation model with SSCCS as the outcome, we found a significant mediator effect of S-MAAS (Figure 1): The direct training effect (group x days) was smaller than the total effect when adding S-MAAS as a mediator, and the indirect effect of S-MAAS on SSCCS reached significance. Thus, the training effect on SSCCS was mediated by S-MAAS. These results remained stable when including a random slope for time.

**Discussion**

This randomised controlled trial implemented an ecological momentary assessment to investigate the impact of an UBM training in comparison to a wait-list control condition. Primary outcomes were the present moment awareness facet of state mindfulness and perceived state self-control, and secondary outcomes were habitual mindfulness and self-control.

We found increased levels in our primary outcomes—perceived state self-control and the present moment awareness facet of state mindfulness—in people who practiced mindfulness. As expected, the UBM training had similar effects on state mindfulness and perceived state self-control across time, which supports the assumption that state mindfulness and perceived state self-control can both be practiced using brief breathing meditations. Even though we only found small effects for state mindfulness and perceived state self-control, Wichers, Wigman, and Myin-Germeys (2015) suggest that the cumulative effect of such micro-processes may be important to improving well-being and health in the long run. Based on this assumption, we believe that the cumulative effect of regularly practicing state mindfulness in daily life may have improved habitual mindfulness over the course of the training, as reflected in increased habitual mindfulness and improved BCA in BCT.

The observed changes in habitual mindfulness were comparable to other studies, which examined the impact of training mindfulness on habitual mindfulness in undergraduate student populations. For example, Demarzo et al. (2017) who compared an abbreviated 4-session to an 8-week mindfulness-based program found an increase by 6-7% in MAAS scores in individuals of both programs and their participants showed comparable post-training mean MAAS values of 4.2 (sum scores of around 62.5).

Even though we found individuals in the UBM training to report more increased habitual mindfulness than individuals in the control condition, we did not find the same for habitual self-control: Individuals in the UBM training reported increases in habitual self-control, but those improvements were comparable to those in the control condition. Thus, changes in SCS may be attributed to the simple act of taking part in the study, the systematic self-monitoring through the ambulatory assessment or impression management. However, we could rule out that changes in SCS were attributable to impression management since the variable social desirability could not explain increases in mindfulness over the time. Nevertheless, the found null effect of the UBM training on SCS is contrary to recent mindfulness trainings (e.g., 6 weekly 2 hour sessions) that have indeed shown to positively influence habitual self-control and conscientiousness in comparison to a control condition (Canby et al. 2015). Thus, even though our UBM training improved state self-control, state mindfulness, and, ultimately, habitual mindfulness, a more elaborate mindfulness training may be necessary to change habitual self-control patterns.

However, we found some unexplained variability between individuals regarding their changes in state mindfulness as response to the UBM training. This unexplained variability could be partially explained by the degree of individual home practice engagement in that individuals who spent more time at practicing mindfulness at home experienced a stronger improvement in state mindfulness than those who did not practice at home. Hence, in line with a previous study (Carmody & Baer 2008), additional home practice seems to play an important role and needs to be integrated in more detail when developing UBM trainings by, for example, reminding participants on a daily basis via smartphones to practice mindfulness or by helping participants to find time and space in their daily life in which they can integrate their daily meditation practice.

Furthermore, while other mindfulness training studies found participants with high neuroticism or conscientiousness to benefit most from practicing mindfulness, experiencing decreased anxiety or increased subjective well-being (e.g., de Vibe et al. 2015; Nyklíček & Irrmischer 2017), we first found that the present training instead worked better for participants with low openness to enhance perceived state self-control in comparison to participants with high openness, as presented in the results section ‘Moderation Effects of Interpersonal Characteristics’. Additional baseline factors, such as previous yoga experience, which may be associated with increased self-monitoring (Salmon, Lush, Jablonski, & Sephton 2009) also seemed to enhance the effects of the UBM training on state mindfulness. However, these findings should be considered with caution since effects did no longer reach significance under stricter model conditions that took random time effects into account and corrected for multiple testing. Future research should, based on these inconsistencies, further examine what populations benefit most from UBM trainings.

Finally, to determine how our UBM training influenced perceived state self-control, we examined whether training effects on perceived state self-control could be explained by improvements in state mindfulness. We assumed that training mindfulness may help people to restore and strengthen perceived state self-control (Kaplan & Berman 2010) through an improved focus on the present moment. Even though the assessment of state mindfulness and perceived state self-control referred to different time spans (state mindfulness since the last signal; perceived state self-control in the present moment) we found evidence that the UBM training effect on current perceived state self-control was explained by enhanced state mindfulness, which highlights the important role that state mindfulness may play for perceived state self-control. However, if both concepts were assessed with similar or same time spans as reference of self-report, associations between both concepts might have been even stronger.

Overall, the present study showed that an UBM training improved both the present moment facet of mindfulness and perceived state self-control, demonstrating the interconnectedness of both phenomena. Several open questions remain that future research should address. First, both concepts were represented by only one of several possible facets. The UBM training, state mindfulness, and habitual mindfulness focused mainly on the present moment awareness so that we neglected the training of a broader aspect of mindfulness (e.g., MBSR; Kabat-Zinn 1990) and the assessment of further important facets, such as non-judgmental acceptance (Blanke & Brose 2017). By choosing to rely on a broader concept of mindfulness, future research may be able to explain in more detail how training mindfulness may enhance perceived self-control through specific mindfulness facets.

Furthermore, we assessed perceived state self-control by using the SSCCS items, which tap into how exhausted someone currently is. Since this scale was originally developed under the assumption that self-control performance relies on a limited inner resource that can be depleted after the previous use of self-control (Bertrams et al. 2011), it is not quite clear what the SSCCS actually measured. The SSCCS items do not clearly differentiate between the motivation to engage into self-control, the current self-control ability or capacity that someone *believes* to have. Besides that, there is a current debate of whether self-control performance actually relies on some sort of inner capacity that can be depleted after self-control enactment (for a meta-analysis of the so called ego depletion effect, see Carter, Kofler, Forster, & McCullough 2015) or whether the perceived self-control ability can be interpreted from a more motivational perspective, for example, as mental fatigue (Inzlicht & Schmeichel 2012). For more in-depth information about the current controversy on a limited self-control capacity, we refer to an extensive review that has discussed this important topic in more detail (Friese, Loschelder, Gieseler, Frankenbach, & Inzlicht 2019). Thus, due to inconsistent views of what self-ascribed self-control actually refers to, it would be important to examine both the perceived ability to act self-controlled and the motivation to act in line with one’s own goals in relation to mindfulness.

In addition, it is important to note that one’s belief to be self-controlled on a state or trait level does not necessarily predict the actual self-control performance in daily life: On the contrary, recent studies have found that people who ascribed themselves as being more self-controlled than others reported less often to actually act self-controlled in daily life (Grund & Carstens 2019; Hofmann et al. 2012). Grund and Carstens (2019) discussed that self-ascribed ‘self-controlled’ individuals preferred activities that they perceived as being relatively effortless and which were in line with their own needs and goals. Thus, we do not assume that our UBM training improved the actual self-control performance in daily life. Instead we believe that the UBM training may have promoted the awareness of one’s own goals so that individuals were able to choose behaviours in accordance to them (Brown & Ryan 2003). These behaviours may have been experienced as being less effortful (Rheinberg & Engeser 2010), as reflected by an enhanced self-ascribed state self-control.

Furthermore, mindfulness may promote a more adaptive and flexible use of self-control, which may be reflected in enhanced perceived state self-control. A recent ecological momentary assessment study (Friese & Hofmann 2016) has found that increased state mindfulness came along with stronger desires, less resistance towards, and more enactment on these desires, thus possibly not facilitating self-control performance every time desires were experienced. However, when participants experienced a conflict with their self-set goals, these differences could not be found: Mindful participants were as good as less mindful participants in resisting their desires. Thus, mindfulness may support people to differentiate between present moments that can be enjoyed by engaging into current desires and moments in which self-control performance can be helpful to stick to long-term goals (Friese & Hofmann 2016).

**Limitations and Future Research**

Taken together, our results ought to be interpreted cautiously in regard to how mindfulness is associated with self-control and how training mindfulness may foster self-control. Since the present study focused on only one-dimensional concepts of mindfulness and perceived state self-control (not the actual self-control performance), the found association between state mindfulness and perceived state self-control may be only interpreted as ‘being aware of the present moment’ (S-MAAS) goes along with the belief of ‘being less exhausted’ (SSCCS). Future research may therefore choose to use a more elaborated UBM training and self-report measures that differentiate between specific facets of both phenomena to paint a more detailed picture on how mindfulness and self-control can be improved by training mindfulness and how they are associated with each other in daily life. A further focus on the actual monitoring processes that play an important role in both mindfulness and self-control should be considered when assessing self-control.

Moreover, we have to acknowledge some methodological limitations. Since we compared the effects of our UBM training with a wait-list control condition, we can only make implications on whether our UBM training had an effect in comparison to no training at all. However, it can be assumed that a treatment as usual, for example, a more elaborate mindfulness training, may have had more impact on mindfulness and self-control in daily life than our UBM training. This research may serve as basis for future research to investigate and compare the beneficial effects of more or less intense mindfulness trainings.

Furthermore, participants were not blinded to their condition allocation. Thus, they could have had some expectancies as to how mindfulness and self-control should change during study participation depending on what condition they were assigned to. Additionally, not only those who were assigned to the mindfulness condition but also participants assigned to the control condition were asked to come to weekly appointments to fill out questionnaires about self-control and mindfulness. Solely the act of coming to fixed appointments may have had additional effects on how participants in the control condition perceived themselves as being self-controlled and mindful. However, we could rule out that changes in mindfulness and self-control in the UBM training condition were caused by only the weekly appointments since both conditions attended to them. Nevertheless, these points may limit the interpretation of our results and need to be considered when planning further mindfulness research.

Another limitation concerns the BCT (Levinson et al. 2014), our behavioural measure of mindfulness. Since we chose a version of the BCT in which we disrupted the task for 12 times asking for current mind wandering and meta-awareness, participants repeatedly counted their breath for an average of only 90 seconds between disruptions. This may explain the overall high rates of counting accuracy. Another version of the BCT in which individuals are instructed to count their breaths for 18 minutes straight may be a better performance measure to capture training effects (Levinson et al. 2014). However, the BCT offers a behavioural measure of mindfulness that does not depend on expectancy effects or the truthfulness of participants. Future research is necessary to explore its value in mindfulness training trials.

Finally, the generalizability of our findings on other student populations is limited. Our sample consisted mainly of undergraduate female psychology students who did not report self-control issues regarding risky health behaviours (e.g., drinking or smoking). This sample further self-selected when more extraverted individuals prematurely ended study participation than did less extraverted individuals. One possible explanation could be that extraverted participants experienced this intense ecological momentary assessment as a greater burden, as it may have disrupted their social interactions and activities more strongly.

Furthermore, our participants received course credits in return for their study participation so that we cannot ensure that they participated on a completely voluntary basis. However, since several different studies were running at the same time, participants were able to choose between studies they wanted to take part in to receive their course credits. We felt that our sample showed considerable interest in training mindfulness and we received mostly positive feedback after study completion. Nevertheless, further research in people who actually choose to practice mindfulness without any external reward could lead to differing results.

Hence, our sample is not representative of the general student population, limiting conclusions on how UBM trainings change mindfulness and perceived self-control. Future research on whether UBM trainings impact mindfulness and perceived self-control should study a broader student population, including students who may be at risk for serious health conditions.

**Data Availability Statement**

All data are available at the Open Science Framework (<https://osf.io/3gsh6/>)

**Compliance with Ethical Standards**

**Ethical Approval**

All procedures performed in studies involving human participants were in accordance with the ethical standards of the institutional research committee and with the 1964 Helsinki declaration and its later amendments or comparable ethical standards. This trial was approved by the local ethics committee at the Institute of Psychology at the Johannes Gutenberg-University of Mainz, Germany (2015-JGU-psychEK-011).

**Informed Consent**

Informed consent was obtained from all individual participants included in the study.

**Author Contributions**

ZR: conducted and organised the study, analysed the data, and wrote the first draft of the manuscript. MW: designed and organised the study, assisted with the data analyses, contributed to the writing and editing of the manuscript. TK: assisted with the data analyses and contributed to the writing and editing of the final manuscript. All authors approved the final version of the manuscript for submission.

**Conflict of Interest**

The authors have no conflict of interest to declare.

**References**

Aarts, E., Verhage, M., Veenvliet, J. V., Dolan, C. V., & van der Sluis, S. (2014). A solution to dependency:

Using multilevel analysis to accommodate nested data. *Nature Neuroscience*, *17*, 491–496. https://doi.org/10.1038/nn.3648

Auerbach, R. P., Alonso, J., Axinn, W. G., Cuijpers, P., Ebert, D. D., Green, J. G., … Bruffaerts, R.

(2016). Mental disorders among college students in the World Health Organization World Mental Health Surveys. *Psychological Medicine*, *46*(14), 2955–2970. https://doi.org/10.1017/S0033291716001665

Baldwin, S. A., Imel, Z. E., Braithwaite, S. R., & Atkins, D. C. (2014). Analyzing multiple outcomes in clinical

research using multivariate multilevel models. *Journal of Consulting and Clinical Psychology*, *82*(5),

920–930. <https://doi.org/10.1037/a0035628>

Baumeister, R. F., Bratlavsky, E., Muraven, M., Tice, D. M. (1998). Ego depletion: Is the active self a limited

resource? *Journal of Personality and Social Psychology*, *74*(5), 1252–1265. http://dx.doi.org/10.1037/0022-3514.74.5.1252

Baumeister, R. F., Heatherton, T. F., & Tice, D. M. (1994). *Losing control: How and why people fail at self-*

*regulation*. San Diego: Academic Press, Inc.

Bertrams, A., & Dickhäuser, O. (2009). Messung dispositioneller Selbstkontroll-Kapazität Eine deutsche

Adaptation der Kurzform der Self-Control Scale (SCS-K-D) [Measuring dispositional self-control

capacity. A German adaptation of the short form of the Self-Control Scale (SCS-K-D)]. *Diagnostica*,

*55*(1), 2–10. https://doi.org/10.1026/0012-1924.55.1.2

Bertrams, A., Unger, A., & Dickhäuser, O. (2011). Momentan verfügbare Selbstkontrollkraft – Vorstellung

eines Messinstruments und erste Befunde aus pädagogisch-psychologischen Kontexten [Momentarily

Available Self-Control Strength – Introduction of a Measure and First Findings from Educational-

Psychological Contexts]. *Zeitschrift für Pädagogische Psychologie*, *25*(3), 185–196.

https://doi.org/10.1024/1010-0652/a000042

Bishop, S. R., Lau, M., Shapiro, S., Carlson, L., Anderson, N. D., Carmody, J., … Devins, G. (2004).

Mindfulness: A proposed operational definition. *Clinical Psychology:* *Science and Practice*, *11*(3),

230–241. https://doi.org/10.1093/clipsy.bph077

Blanke, E. S., & Brose, A. (2017). Mindfulness in daily life: A multidimensional approach. *Mindfulness*, *8*(3),

737–750. https://doi.org/10.1007/s12671-016-0651-4

Brown, K. W., & Ryan, R. M. (2003). The benefits of being present: Mindfulness and its role in psychological

well-being. *Journal of Personality and Social Psychology*, *84*(4), 822–848.

https://doi.org/10.1037/0022-3514.84.4.822

Brown, K. W., Ryan, R. M., & Creswell, J. D. (2007). Mindfulness: Theoretical foundations and evidence for its

salutary effects. *Psychological Inquiry*, *18*(4), 211–237. http://dx.doi.org/10.1080/10478400701598298

Canby, N. K., Cameron, I. M., Calhoun, A. T., & Buchanan, G. M. (2015). A brief mindfulness intervention for

healthy college students and its effects on psychological distress, self-control, meta-mood, and subjective vitality. *Mindfulness*, *6*(5), 1071–1081. https://doi.org/10.1007/s12671-014-0356-5

Carmody, J., & Baer, R. A. (2008). Relationships between mindfulness practice and levels of mindfulness,

medical and psychological symptoms and well-being in a mindfulness-based stress reduction program.

*Journal of Behavioral Medicine*, *31*, 23–33. https://doi.org/10.1007/s10865-007-9130-7

Carmody, J., & Baer, R. A. (2009). How long does a mindfulness-based stress reduction program need to be? A

review of class contact hours and effect sizes for psychological distress. *Journal of Clinical Psychology*,

*65*(6), 627–638. <https://doi.org/10.1002/jclp.20555>

Carter, E. C., Kofler, L. M., Forster, D. E., & McCullough, M. E. (2015). A series of meta-analytic tests of the

depletion effect: Self-control does not seem to rely on a limited resource. *Journal of Experimental*

*Psychology: General*, *144*(4), 796–815. https://doi.org/10.1037/xge0000083

Chakraborty, H. & Gu, H. (2009). *A mixed model approach for intent-to-treat analysis in longitudinal clinical*

*trials with missing values*. (RTI Press Publication No. MR-0009-0903). Research Triangle Park, NC: RTI Press. https://doi.org/10.3768/rtipress.2009.mr.0009.0903

Ciarocco, N. J., Twenge, J. M., Muraven, M., & Tice, D. M. (2007). *Measuring state self-control: Reliability,*

*validity, and correlations with physical and psychological stress.* Unpublished manuscript, Monmouth

University, NJ, USA.

Deci, E. L., & Ryan, R. M. (1980). Self-determination theory: When mind mediates behavior. *Journal of*

*Mind and Behavior*, *1*(1), 33–43.

Demarzo, M., Montero-Marin, J., Puebla-Guedea, M., Navarro-Gil, M., Herrera-Mercadal, P., Moreno-

González, S., … Garcia-Campayo, J. (2017). Efficacy of 8- and 4-session mindfulness-based interventions in a non-clinical population: A controlled study. *Frontiers in Psychology*, *8*, 1343 <https://doi.org/10.3389/fpsyg.2017.01343>

de Ridder, D. T. D., Lensvelt-Mulders, G., Finkenauer, C., Stok, F. M., & Baumeister, R. F. (2012). Taking

stock of self-control: A meta-analysis of how trait self-control relates to a wide range of

behaviors. *Personality and Social Psychology Review*, *16*(1), 76–99. https://doi.org/10.1177/1088868311418749

de Vibe, M., Solhaug, I., Tyssen, R., Friborg, O., Rosenvinge, J. H., Sørlie, T., …Bjørndal, A. (2015). Does

personality moderate the effects of mindfulness training for medical and psychology students?

*Mindfulness*, *6*(2), 281–289. <https://doi.org/10.1007/s12671-013-0258-y>

Feltman, R., Robinson, M. D., & Ode, S. (2009). Mindfulness as a moderator of neuroticism–outcome relations:

A self-regulation perspective. *Journal of Research in Personality*, *43*(6), 953–961. https://doi.org/10.1016/j.jrp.2009.08.009

Friese, M., & Hofmann, W. (2016). State mindfulness, self-regulation, and emotional experience in everyday

life. *Motivation Science*, *2*(1), 1–14. <http://dx.doi.org/10.1037/mot0000027>

Friese, M., Loschelder, D. D., Gieseler, K., Frankenbach, J., & Inzlicht, M. (2019). Is ego depletion real? An

analysis of arguments. *Personality and Social Psychology Review*, *23*(2), 107–131. https://doi.org/10.1177/1088868318762183

Friese, M., Messner, C., & Schaffner, Y. (2012). Mindfulness meditation counteracts self-control depletion.

*Consciousness and Cognition*, *21*(2), 1016–1022. <https://doi.org/10.1016/j.concog.2012.01.008>

Grund, A., & Carstens, C. (2019). Self-control motivationally reconsidered: “Acting” self-controlled is

different to “being good” at self-control. *Motivation and Emotion*, *43*(1), 63–81.

https://doi.org/10.1007/s11031-018-9721-3

Hofmann, W., Baumeister, R. F., Förster, G., & Vohs, K. D. (2012). Everyday temptations: An experience

sampling study of desire, conflict, and self-control. *Journal of Personality and Social Psychology*,

*102*(6), 1318–1335. https://doi.org/10.1037/a0026545

Holm, S. (1979). A simple sequentially rejective multiple test procedure. *Scandinavian Journal of Statistics*,

*6*(2), 65–70.

Hunt, J., & Eisenberg, D. (2010). Mental health problems and help-seeking behavior among college students.

*Journal of Adolescent Health*, *46*(1), 3–10. https://doi.org/10.1016/j.jadohealth.2009.08.008

Inzlicht, M., & Schmeichel, B. J. (2012). What is ego depletion? Toward a mechanistic revision of the

resource model of self-control. *Perspectives on Psychological Science*, *7*(5), 450–463.

<https://doi.org/10.1177/1745691612454134>

John, O. P., Donahue, E. M., & Kentle, R. L. (1991). *The Big Five Inventory--Versions 4a and 54*. Berkeley,

CA: University of California, Berkeley, Institute of Personality and Social Research.

Josefsson, T., Lindwall, M., & Broberg, A. G. (2014). The effects of a short-term mindfulness based intervention

on self-reported mindfulness, decentering, executive attention, psychological health, and coping style: Examining unique mindfulness effects and mediators. *Mindfulness*, *5*(1), 18–35. https://doi.org/10.1007/s12671-012-0142-1

Kabat-Zinn, J. (1990). *Full catastrophe living: Using the wisdom of your body and mind to face stress, pain, and*

*illness.* New York, NY: Dell.

Kabat-Zinn, J. (1982). An outpatient program in behavioral medicine for chronic pain patients based on the

practice of mindfulness meditation: Theoretical considerations and preliminary results. *General*

*Hospital Psychiatry*, *4*(1), 33–47.

Kaplan, S. (2001). Meditation, restoration, and the management of mental fatigue. *Environment and Behavior*,

*33*(4), 480–506. https://doi.org/10.1177/00139160121973106

Kaplan, S., & Berman, M. G. (2010). Directed attention as a common resource for executive functioning and

self-regulation. *Perspectives on Psychological Science*, *5*(1), 43–57.

<https://doi.org/10.1177/1745691609356784>

Khoury, B., Lecomte, T., Fortin, G., Masse, M., Therien, P., Bouchard, V., … Hofmann, S. G. (2013).

Mindfulness-based therapy: A comprehensive meta-analysis. *Clinical Psychology Review*, *33*(6), 763–

771. https://doi.org/10.1016/j.cpr.2013.05.005

Lang, F. R., Lüdtke, O., & Asendorpf, J. B. (2001). Testgüte und psychometrische Äquivalenz der deutschen

Version des Big Five Inventory (BFI) bei jungen, mittelalten und alten Erwachsenen [Validity and

psychometric equivalence of the German version of the Big Five Inventory in young, middle-aged and

old adults]. *Diagnostica*, *47*(3), 111–121. https://doi.org/10.1026//0012-1924.47.3.111

Levinson, D. B., Stoll, E. L., Kindy, S. D., Merry, H. L., & Davidson, R. J. (2014). A mind you can count on:

Validating breath counting as a behavioral measure of mindfulness. *Frontiers in Psychology*, *5*,

1202. https://doi.org/10.3389/fpsyg.2014.01202

Lindsay, E. K., & Creswell, J. D. (2017). Mechanisms of mindfulness training: Monitoring and Acceptance

Theory (MAT). *Clinical Psychology Review*, *51*, 48–59. http://dx.doi.org/10.1016/j.cpr.2016.10.011

Linehan, M. M. (1993). *Diagnosis and treatment of mental disorders. Cognitive-behavioral treatment of*

*borderline personality disorder.* New York, NY, US: Guilford Press.

Liu, X., Wang, S., Chang, S., Chen, W., & Si, M. (2013). Effect of brief mindfulness intervention on tolerance

and distress of pain induced by cold-pressor task. *Stress and Health*, *29*(3), 199–204. https://doi.org/10.1002/smi.2446

Mahmood, L., Hopthrow, T., & de Moura, G. R. (2016). A moment of mindfulness: Computer-mediated

mindfulness practice increases state mindfulness. PLoS ONE, 11(4), e0153923.

https://doi.org/10.1371/journal.pone.0153923

Michalak, J., Heidenreich, T., Ströhle, G., & Nachtigall, C. (2008). Die deutsche Version der Mindful Attention

and Awareness Scale (MAAS): Psychometrische Befunde zu einem Achtsamkeitsfragebogen [German

version of the Mindful Attention an Awareness Scale (MAAS)—Psychometric features of a mindfulness questionnaire]. Zeitschrift für Klinische Psychologie und Psychotherapie: Forschung und Praxis, 37(3), 200-208. http://dx.doi.org/10.1026/1616-3443.37.3.200

Muraven, M. (2010). Building self-control strength: Practicing self-control leads to improved self-control

performance. *Journal of Experimental Social Psychology*, *46*(2), 465–468.

https://doi.org/10.1016/j.jesp.2009.12.011

Nyklíček, I., & Irrmischer, M. (2017). For whom does mindfulness-based stress reduction work? Moderating

effects of personality. *Mindfulness*, *8*(4), 1106–1116.

<https://doi.org/10.1007/s12671-017-0687-0>

Rheinberg, F., & Engeser, S. (2010). Motive training and motivational competence*.* In O. C. Schultheiss & J. C.

Brunstein (Eds.), *Implicit Motives* (pp. 510–548). Oxford: University Press.

Rowland, Z., Wenzel, M., & Kubiak, T. (2016). The effects of computer-based mindfulness training on self-

control and mindfulness within ambulatorily assessed network systems across health-related domains

in a healthy student population (SMASH): Study protocol for a randomized controlled trial. *Trials*,

*17*, 570. https://doi.org/[10.1186/s13063-016-1707-4](http://dx.doi.org/10.1186/s13063-016-1707-4)

Ruscio, A. C., Muench, C., Brede, E., MacIntyre, J., & Waters, A. J. (2016). Administration and assessment of

brief mindfulness practice in the field: A feasibility study using ecological momentary assessment.

Mindfulness, 7(4), 988–999. <http://dx.doi.org/10.1007/s12671-016-0538-4>

Salmon, P., Lush, E., Jablonski, M., Sephton, S. E. (2009). Yoga and mindfulness: Clinical aspects of an ancient

mind/body practice. *Cognitive and Behavioral Practice*, *16*(1), 59–72. https://doi.org/10.1016/j.cbpra.2008.07.002

Schulz, K. F., & Grimes, D. A. (2002). Generation of allocation sequences in randomised trials: Chance, not

choice. *The Lancet*, *359*(9305), 515–519. https://doi.org/10.1016/S0140-6736(02)07683-3

Segal, Z. V., Williams, J. M. G., & Teasdale, J. D. (2002). *Mindfulness-based cognitive therapy for depression:*

*A new approach to preventing relapse*. New York, NY, US: Guilford Press.

Shrout, P. E., & Lane, S. P. (2012). Psychometrics. In M. R. Mehl & T. S. Conner (Eds.), *Handbook of research*

*methods for studying daily life* (pp. 302–321). New York, NY, US: Guilford Press.

Snapinn, S. M., & Jiang, Q. (2007). Responder analyses and the assessment of a clinically relevant treatment

effect. *Trials*, *8*(31), 1–6. https://doi.org/10.1186/1745-6215-8-31

Stöber, J. (2001). The Social Desirability Scale-17 (SDS-17). *European Journal of Psychological Assessment*,

*17*(3), 222–232. https://doi.org/10.1027//1015-5759.17.3.222

Tangney, J. P., Baumeister, R. F., & Boone, A. L. (2004). High self-control predicts good adjustment, less

pathology, better grades, and interpersonal success. *Journal of Personality*, *72*(2), 271–324. https://doi.org/10.1111/j.0022-3506.2004.00263.x

Trull, T. J., & Ebner-Priemer, U. (2013). Ambulatory assessment. *Annual Review of Clinical Psychology*, *9*,

151–176. https://doi.org/10.1146/annurev-clinpsy-050212-185510

Wichers, M., Wigman, J. T. W., & Myin-Germeys, I. (2015). Micro-level affect dynamics in psychopathology

viewed from complex dynamical system theory. *Emotion Review*, *7*(4), 362–367. <https://doi.org/10.1146/10.1177/1754073915590623>

World Medical Association. (2013). World Medical Association Declaration of Helsinki ethical principles for

medical research involving human subjects. *JAMA: Journal of the American Medical Association*,

*310*(20), 2191-2194. http://dx.doi.org/10.1001/jama.2013.281053

Zeidan, F., Johnson, S. K., Diamond, B. J., David, Z., & Goolkasian, P. (2010). Mindfulness meditation

improves cognition: Evidence of brief mental training. *Consciousness and Cognition*, *19*(2), 597–605.

https://doi.org/10.1016/j.concog.2010.03.014

Table 1

*Training effects (Time x Group), estimated marginal means (EMM), and simple slopes from the (multivariate) mixed models predicting primary outcome measures, secondary outcome measures, and the BCT*

|  |  | UBM Training | | |  |  | Control condition | | |  |  | Training effect |  |
| --- | --- | --- | --- | --- | --- | --- | --- | --- | --- | --- | --- | --- | --- |
|  |  | t0 or day1 | t6 or day40 |  |  |  | t0 or day1 | t6 or day40 |  |  |  | Time x Group |  |
| Outcomes | | *EMM* (*SE*) | *EMM* (*SE*) | *Simple Slope* | *pt* |  | *EMM* (*SE*) | *EMM* (*SE*) | *Simple Slope* | *pt* |  | *b (SE)* | *p* |
| *Primary* | SSCCS | 6.00 (0.09) | 6.50 (0.09) | 0.013 (0.001) | <.001 |  | 6.09 (0.09) | 6.33 (0.09) | 0.006 (0.001) | <.001 |  | 0.007 (0.001) | <.001 |
|  | S-MAAS | 5.44 (0.11) | 5.77 (0.11) | 0.008 (0.001) | <.001 |  | 5.81 (0.11) | 5.94 (0.11) | 0.003 (0.001) | .003 |  | 0.005 (0.002) | .001 |
| *Secondary* | SCS | 3.65 (0.09) | 3.79 (0.10) | 0.024 (0.007) | <.001 |  | 3.52 (0.09) | 3.60 (0.09) | 0.012 (0.007) | .062 |  | 0.011 (0.009) | .222 |
|  | MAAS | 3.84 (0.08) | 4.17 (0.08) | 0.055 (0.007) | <.001 |  | 3.94 (0.08) | 3.98 (0.08) | 0.007 (0.007) | .294 |  | 0.049 (0.009) | <.001 |
| *BCT* | BCA | 92.14 (0.77) | 94.70 (0.80) | 2.561 (0.862) | .003 |  | 94.84 (0.77) | 94.96 (0.79) | 0.116 (0.851) | .892 |  | 2.446 (1.211) | .043 |
|  | Mind | 4.34 (0.09) | 4.58 (0.10) | 0.245 (0.103) | .017 |  | 4.16 (0.09) | 4.13 (0.09) | -0.026 (0.101) | .795 |  | 0.272 (0.144) | .060 |
|  | Meta | 3.50 (0.13) | 3.47 (0.13) | -0.035 (0.144) | .806 |  | 3.48 (0.12) | 3.51 (0.13) | 0.029 (0.142) | .836 |  | -0.065 (0.203) | .749 |

*Note.* *N* = 134. Fixed effects, simple slopes, and *p*-values for all outcomes are obtained from the (multivariate) mixed models presented in the Supplementary Material (Model 2 in Table S2, Table S3, and Table S4). UBM training = Ultra-brief mindfulness training; Group = Control condition (0) v. UBM training; Time = Days 1–40, Sessions 0–6 or pre- (0) to-post comparison (6); S-MAAS = State version of the Mindful Attention Awareness Scale; SSCCS = State Self-Control Capacity Scale; MAAS = Mindful Attention Awareness Scale; SCS = Self-Control Scale, transformed to a 6-point scale; BCT = Breath Counting Task; BCA = Breath Counting Accuracy (%); Mind = Mind wandering, attention on task; Meta = Meta-awareness.

Table 2

*Training engagement effects (Time x Practice time) on primary and secondary outcomes during the UBM training*

|  |  | Practice time at -1SD | | |  |  | Practice time at +1SD | | |  |  | Training engagement |  |
| --- | --- | --- | --- | --- | --- | --- | --- | --- | --- | --- | --- | --- | --- |
|  |  | t0 or day1 | t6 or day40 |  |  |  | t0 or day1 | t6 or day40 |  |  |  | Time x Practice |  |
| Outcomes | | *EMM* (*SE*) | *EMM* (*SE*) | *Simple Slope* | *pt* |  | *EMM* (*SE*) | *EMM* (*SE*) | *Simple Slope* | *pt* |  | *b (SE)* | *p* |
| *Primary* | SSCCS | 6.15 (0.11) | 6.57 (0.12) | 0.011 (0.002) | <.001 |  | 5.86 (0.11) | 6.43 (0.11) | 0.015 (0.002) | <.001 |  | 0.002 (0.001) | .071 |
|  | S-MAAS | 5.64 (0.15) | 5.71 (0.15) | 0.002 (0.002) | .295 |  | 5.24 (0.15) | 5.82 (0.15) | 0.015 (0.002) | <.001 |  | 0.005 (0.001) | <.001 |
| *Secondary* | SCS | 3.69 (0.12) | 3.79 (0.12) | 0.017 (0.010) | .084 |  | 3.61 (0.12) | 3.79 (0.12) | 0.029 (0.009) | .002 |  | 0.005 (0.005) | .368 |
|  | MAAS | 3.90 (0.11) | 4.18 (0.11) | 0.047 (0.010) | <.001 |  | 3.78 (0.11) | 4.16 (0.11) | 0.063 (0.010) | <.001 |  | 0.006 (0.006) | .265 |

Note. *N* = 68. UBM training = Ultra-brief mindfulness training; S-MAAS = State version of the Mindful Attention Awareness Scale; SSCCS = State Self-Control Capacity Scale; MAAS = Mindful Attention Awareness Scale; SCS = Self-Control Scale; Practice = additional practice time at home in hours; Time = days 1–40 or sessions 0–6; EMM = estimated marginal means.

Table 3

*Moderation effects of interpersonal characteristics on changes in primary and secondary outcomes during the UBM training*

|  | Primary outcomes | | | |  | Secondary outcomes | | | |
| --- | --- | --- | --- | --- | --- | --- | --- | --- | --- |
|  | S-MAAS | | SSCCS | |  | MAAS | | SCS | |
| Moderator | *b* (*SE*) | *pHolm* | *b* (*SE*) | *pHolm* |  | *b* (*SE*) | *pHolm* | *b* (*SE*) | *pHolm* |
| BFI-O | -0.002 (.002) | .948 | -0.008 (.002) | <.001 |  | -0.027 (.012) | .241 | -0.028 (.011) | .145 |
| BFI-C | 0.005 (.002) | .134 | -0.002 (.002) | .777 |  | -0.004 (.012) | .949 | 0.010 (.012) | .857 |
| BFI-E | 0.002 (.002) | .879 | -0.003 (.002) | .589 |  | -0.009 (.011) | .979 | -0.030 (.011) | .075 |
| BFI-A | 0.001 (.003) | .759 | 0.004 (.002) | .571 |  | -0.012 (.016) | .979 | 0.008 (.016) | .938 |
| BFI-N | -0.001 (.002) | .945 | 0.004 (.002) | .215 |  | 0.012 (.012) | .940 | 0.025 (.011) | .199 |
| SDS-17 | -0.005 (.006) | .940 | 0.008 (.006) | .777 |  | -0.054 (.039) | .849 | -0.040 (.038) | .876 |
| Age | 0.000 (.000) | .681 | 0.000 (.000) | .711 |  | -0.000 (.001) | .988 | 0.001 (.001) | .834 |
| Yoga | 0.015 (.003) | <.001 | 0.008 (.003) | .087 |  | 0.028 (.020) | .823 | -0.010 (.020) | .859 |
| Meditation | 0.002 (.003) | .922 | -0.001 (.003) | .972 |  | 0.019 (.018) | .841 | 0.023 (.017) | .849 |
| Gender | -0.003 (.003) | .903 | -0.003 (.002) | .818 |  | -0.031 (.017) | .488 | -0.038 (.016) | .181 |
| Religious | 0.011 (.003) | <.001 | -0.004 (.003) | .570 |  | -0.045 (.017) | .106 | 0.004 (.017) | .807 |
| Cigarettes | 0.008 (.002) | .013 | 0.003 (.002) | .821 |  | 0.007 (.015) | .980 | -0.031 (.015) | .268 |
| Alcohol | -0.001 (.004) | .928 | 0.001 (.004) | .989 |  | -0.015 (.026) | .986 | -0.043 (.025) | .521 |
| MAAS | 0.002 (.002) | .972 | 0.000 (.002) | .923 |  |  |  | -0.031 (.010) | .042 |
| SCS | 0.006 (.002) | .012 | -0.004 (.002) | .081 |  | -0.020 (.011) | .499 |  |  |

*Note*. *N* = 68. UBM training = Ultra-brief mindfulness training; BFI = Big Five Inventory (Openness, Conscientiousness, Extraversion, Agreeableness, Neuroticism); SDS = Social Desirability Scale; MAAS = Mindful Attention Awareness Scale; SCS = Self-Control Scale; S-MAAS = State version of the Mindful Attention Awareness Scale; SSCCS = State Self-Control Capacity Scale; Yoga = Yes (1) or No (0); Meditation = Yes (1) or No (0); Gender = male (1) or female (0); Religiousness = Yes (1) or No (0); Cigarettes = Yes (1) or No (0); Alcohol Yes (1) or No (0); *pHolm* = Šidák-Holm-corrected *p*-value.

**Fig. 1** Mediation analysis. The UBM training effect (Group x Days) on State Self-Control Capacity Scale (SSCCS) being mediated by State Mindful Attention Awareness Scale (S-MAAS). Because of rounding effects, the total effect does not precisely reflect the sum of the indirect and the direct effects.

**
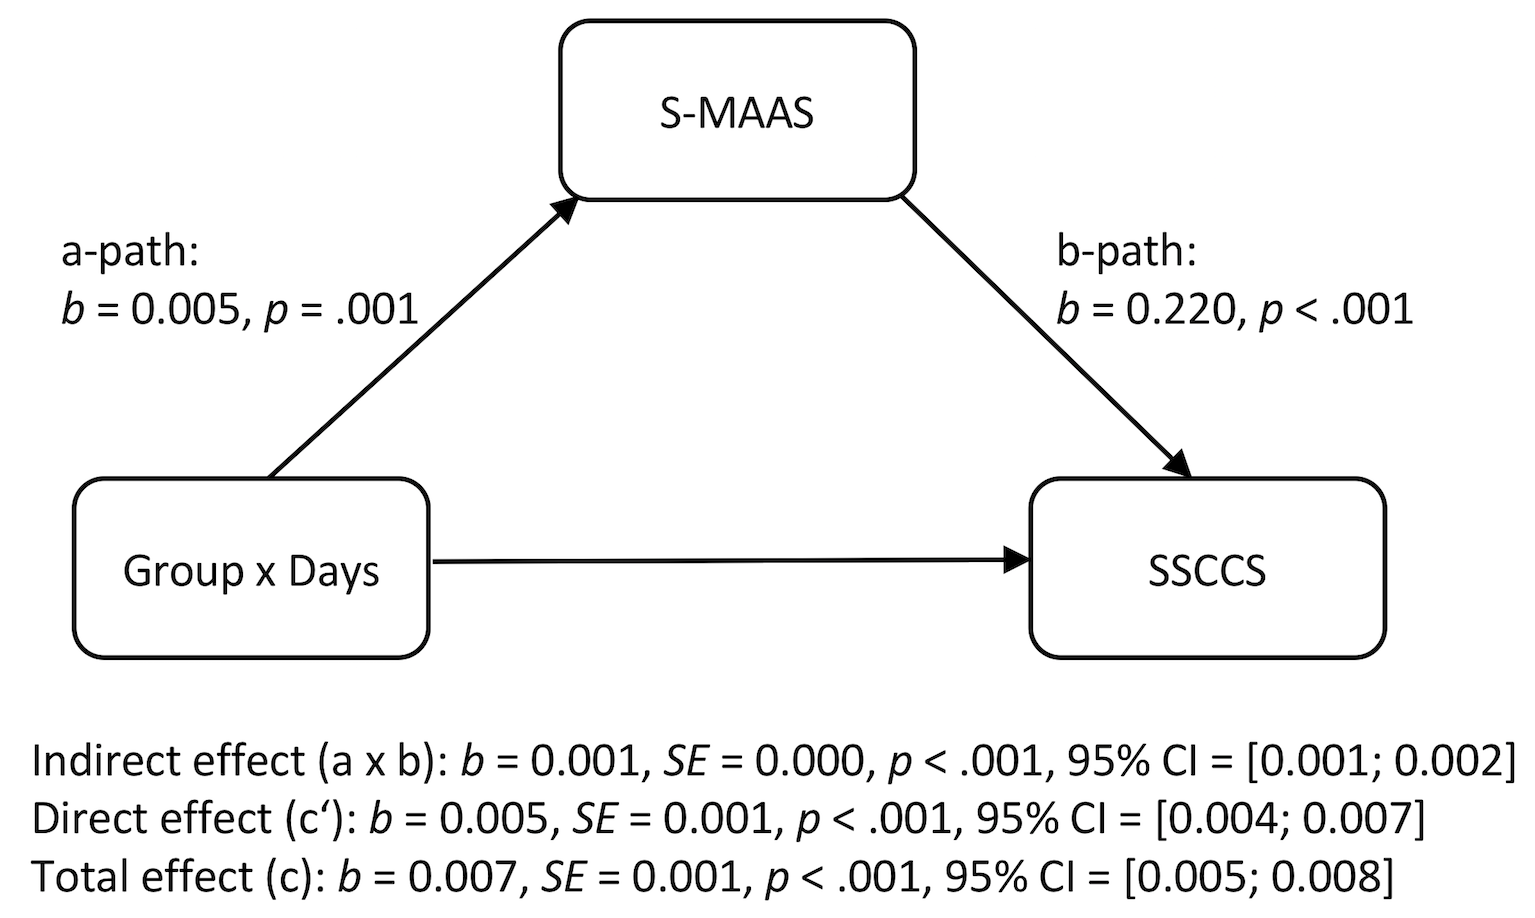
**
